# Supplementary material for: PAR-4 overcomes chemo-resistance in breast cancer cells by antagonizing cIAP1
Source: PubMed Central journal article supplement (PMC6584570; doi:10.1038/s41598-019-45209-9), 2019-06-19
Supplement: 41598_2019_45209_MOESM1_ESM.pdf [file 41598_2019_45209_MOESM1_ESM.pdf]

## Supplementary Information

### **PAR-4 overcomes chemo-resistance in breast cancer cells by antagonizing cIAP1**

Haihong Guo<sup>1,3,#</sup>, Fabian Treude<sup>1,#</sup>, Oliver H. Krämer<sup>2</sup>, Bernhard Lüscher<sup>1</sup>, Jörg Hartkamp<sup>1,3,\*</sup>

<sup>1</sup>Institute of Biochemistry and Molecular Biology, Medical School, RWTH Aachen University, 52074 Aachen, Germany

<sup>2</sup>Department of Toxicology, University Medical Center, 55131 Mainz, Germany

<sup>3</sup>Present address: Clinic for Neuropathology, Medical School, RWTH Aachen University, 52074 Aachen, Germany (HG); Biofrontera Bioscience GmbH, 51377 Leverkusen, Germany (JH)

#These authors contributed equally to this work.

\*Correspondence should be addressed to J.H. ([jhartkamp@gmx.de](mailto:jhartkamp@gmx.de)).

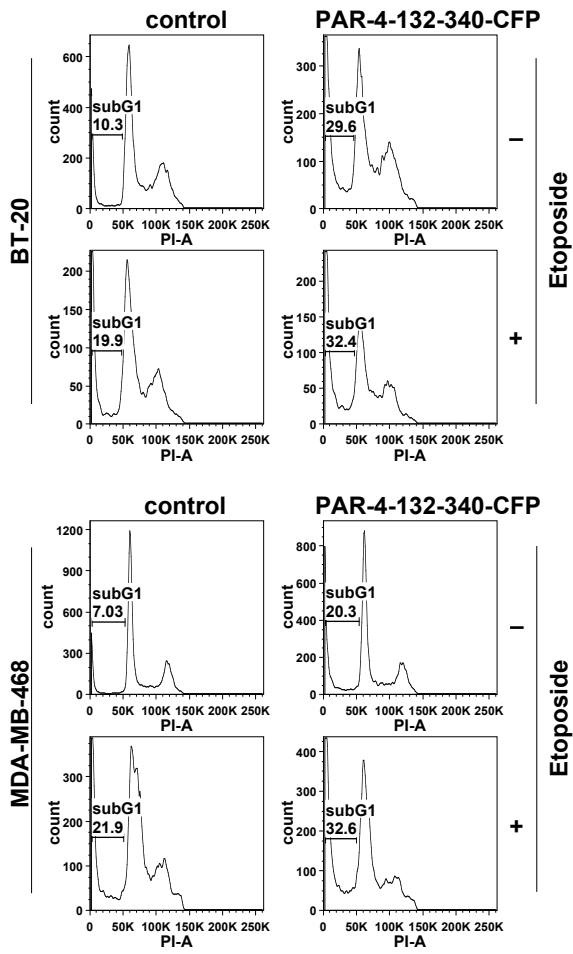

Supplementary Figure S1: Histogram belonging to Figure 4c.

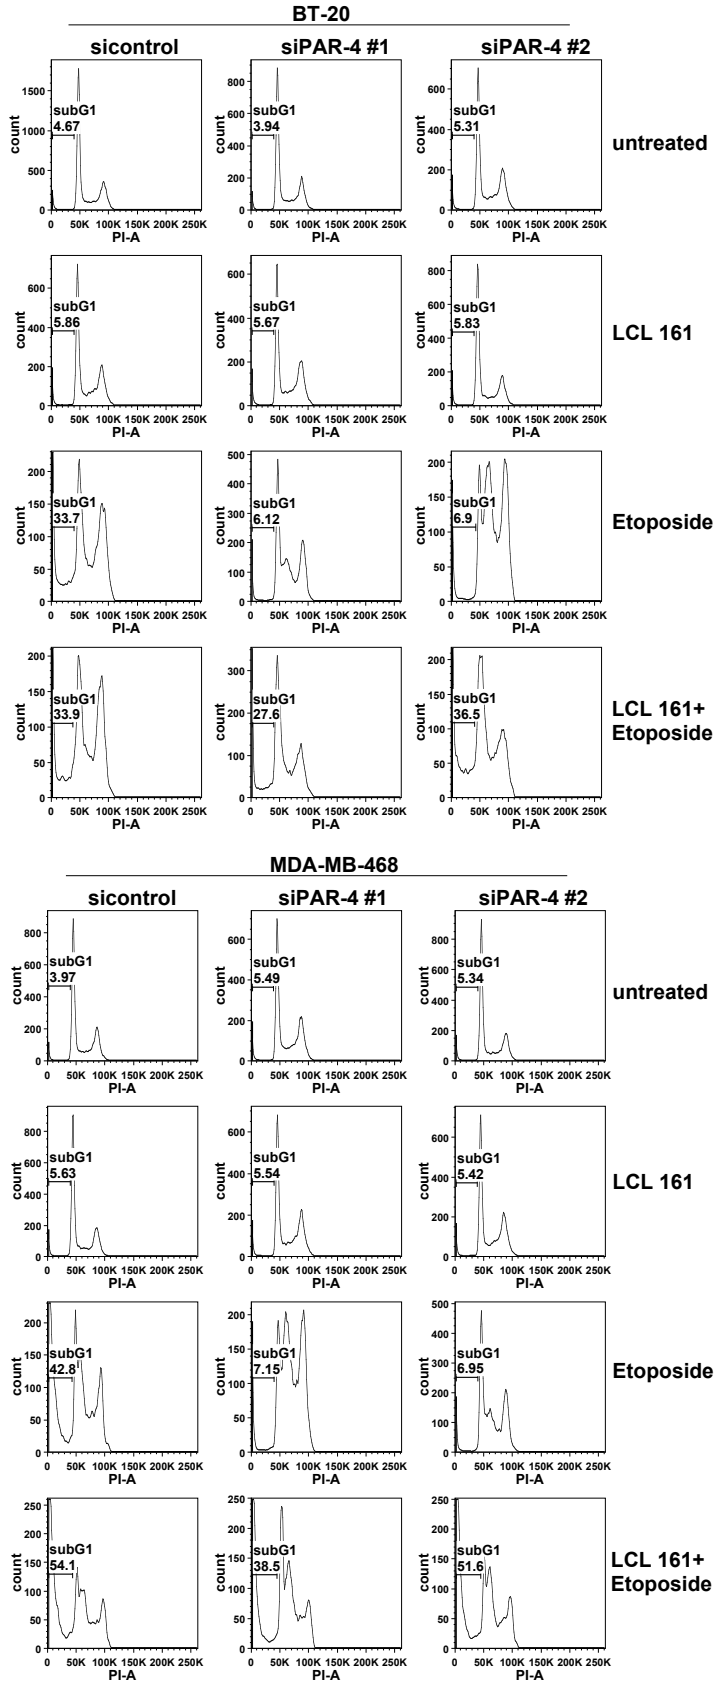

Supplementary Figure S2: Histogram belonging to Figure 6b.

**Belong to Figure 1a**

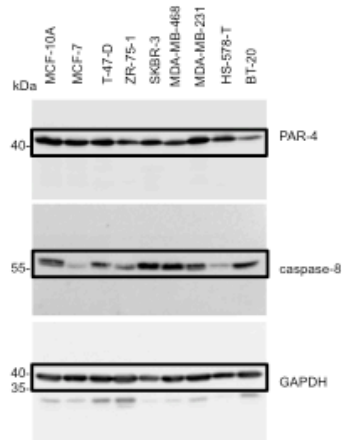

**Belong to Figure 1b**

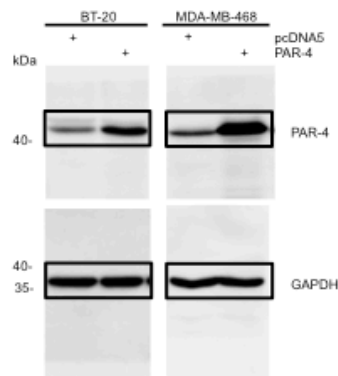

**Belong to Figure 2a**

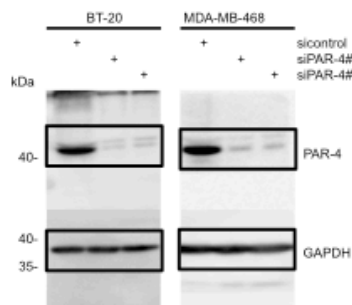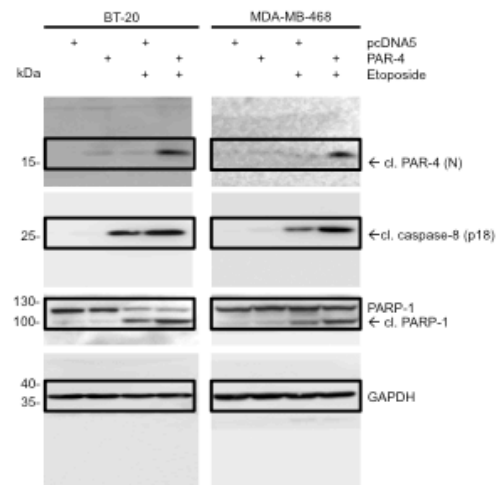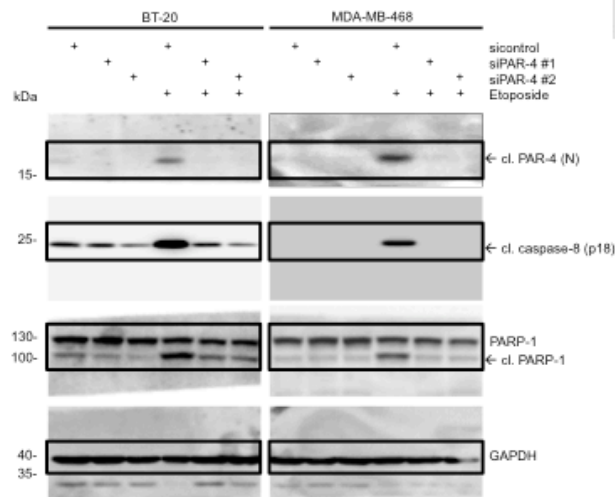

**Supplementary Figure S3:**

Uncropped original images of Western blots are shown belonging to Figure 1 and 2.

**Belong to Figure 3a**

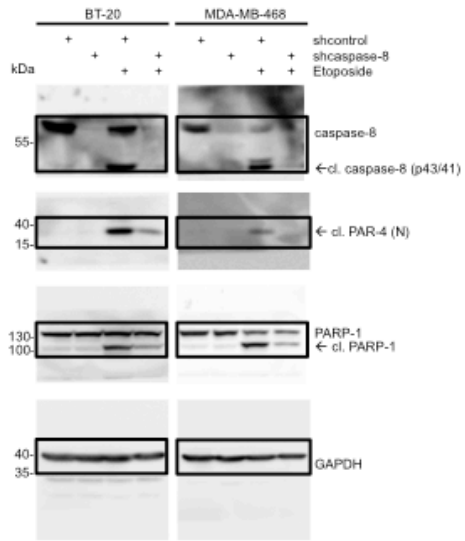

**Belong to Figure 3b**

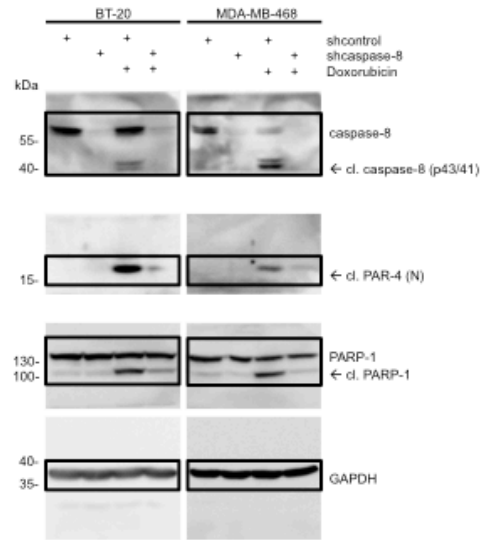

**Belong to Figure 3d**

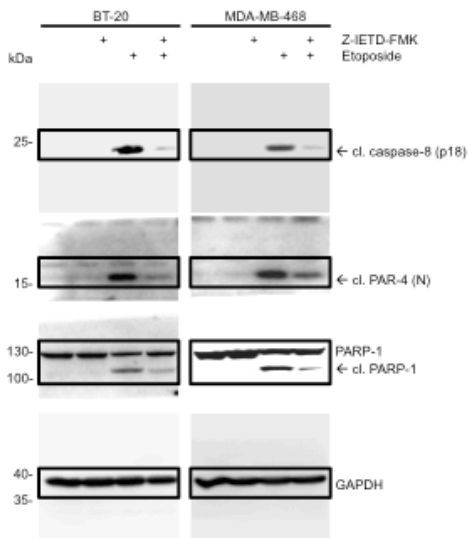

**Belong to Figure 3e**

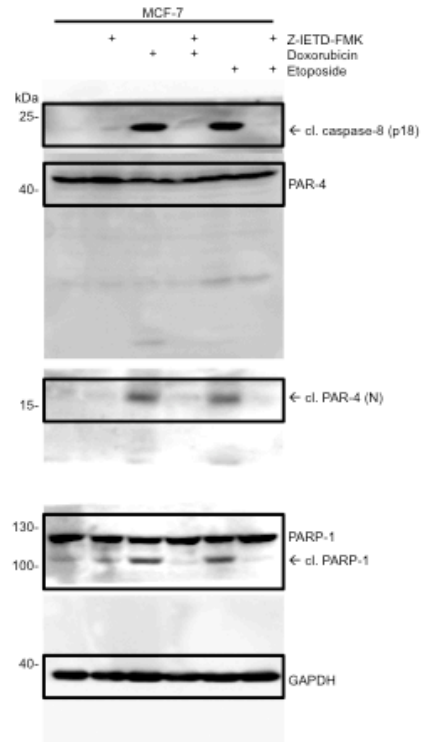

**Supplementary Figure S4:**

Uncropped original images of Western blots are shown belonging to Figure 3.

**Belong to Figure 4b**

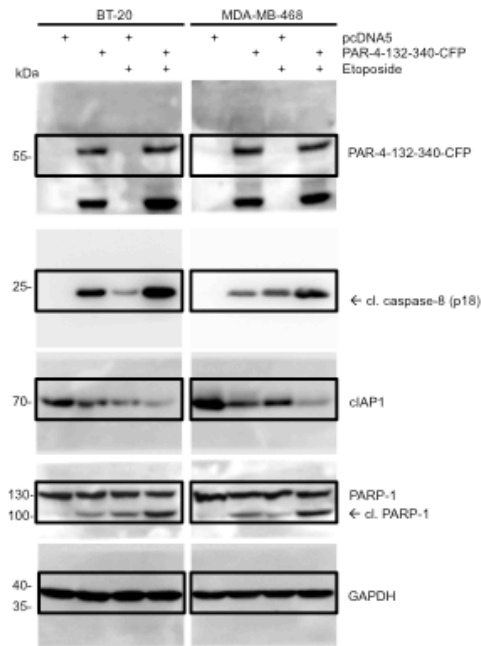

**Belong to Figure 4d**

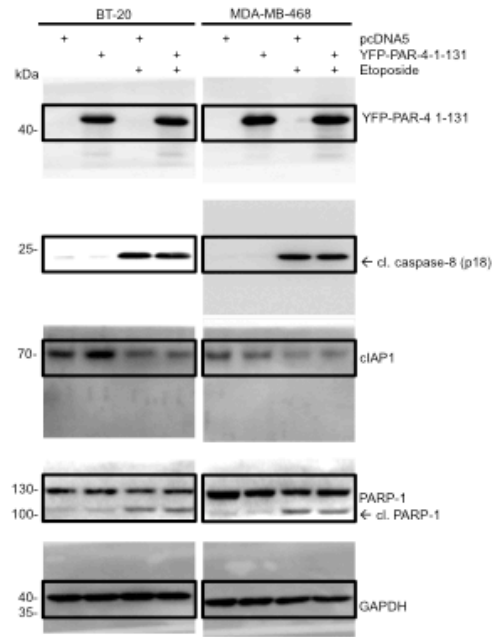

**Belong to Figure 4f**

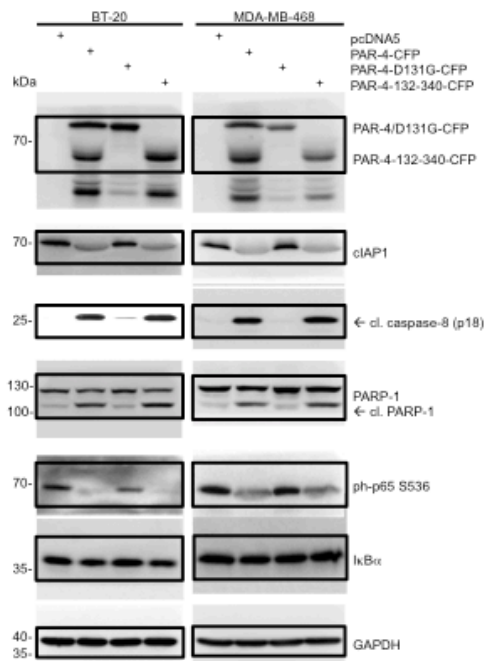

**Supplementary Figure S5:**

Uncropped original images of Western blots are shown belonging to Figure 4.

**Belong to Figure 5a**

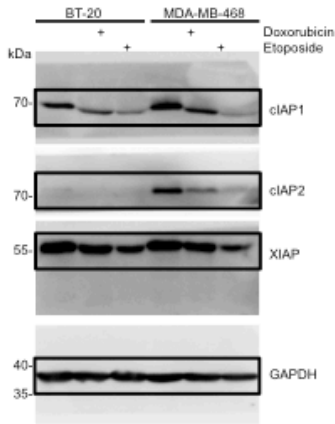

**Belong to Figure 5b**

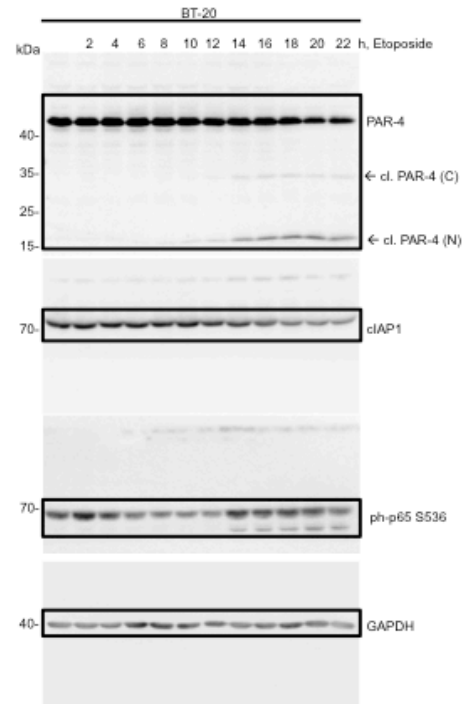

**Belong to Figure 5c**

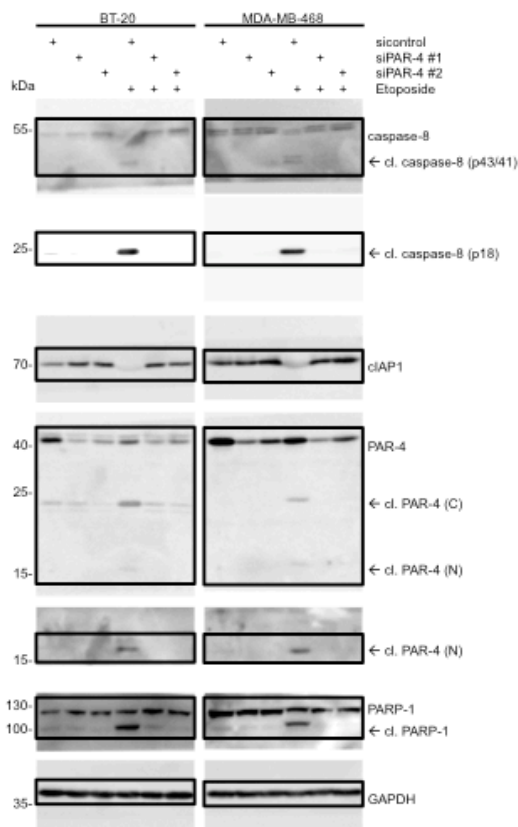

**Belong to Figure 5d**

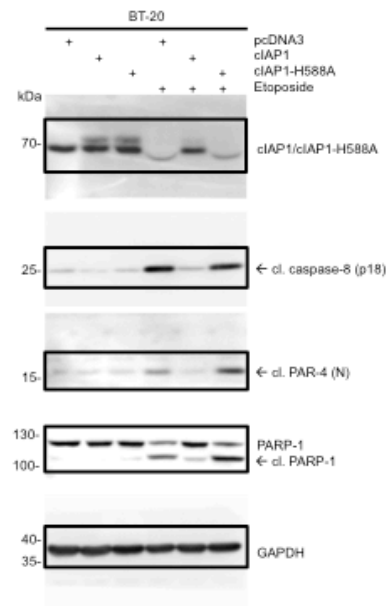

**Supplementary Figure S6:**

Uncropped original images of Western blots are shown belonging to Figure 5.

**Belong to Figure 6a**

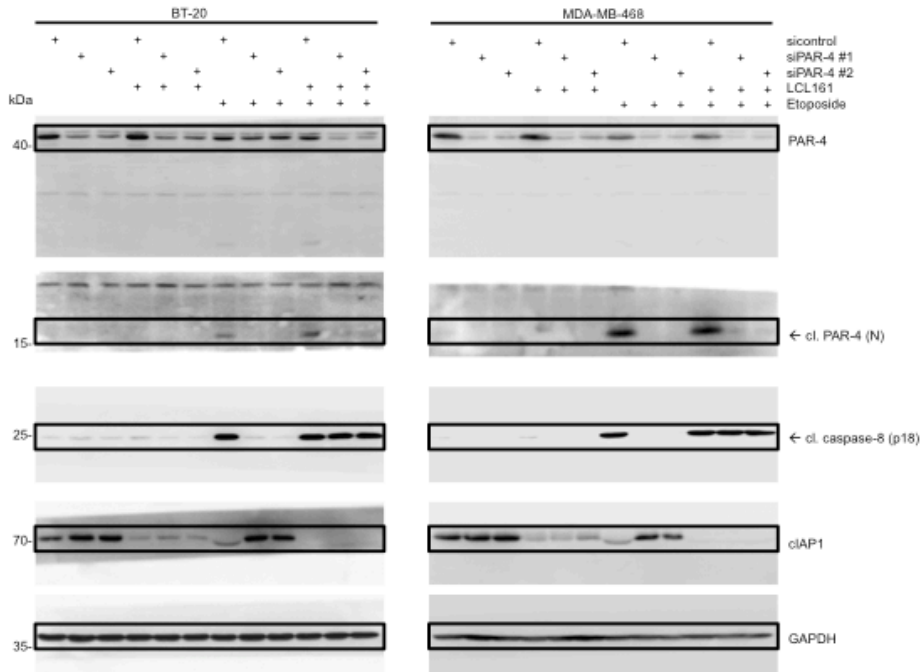

**Belong to Figure 6c**

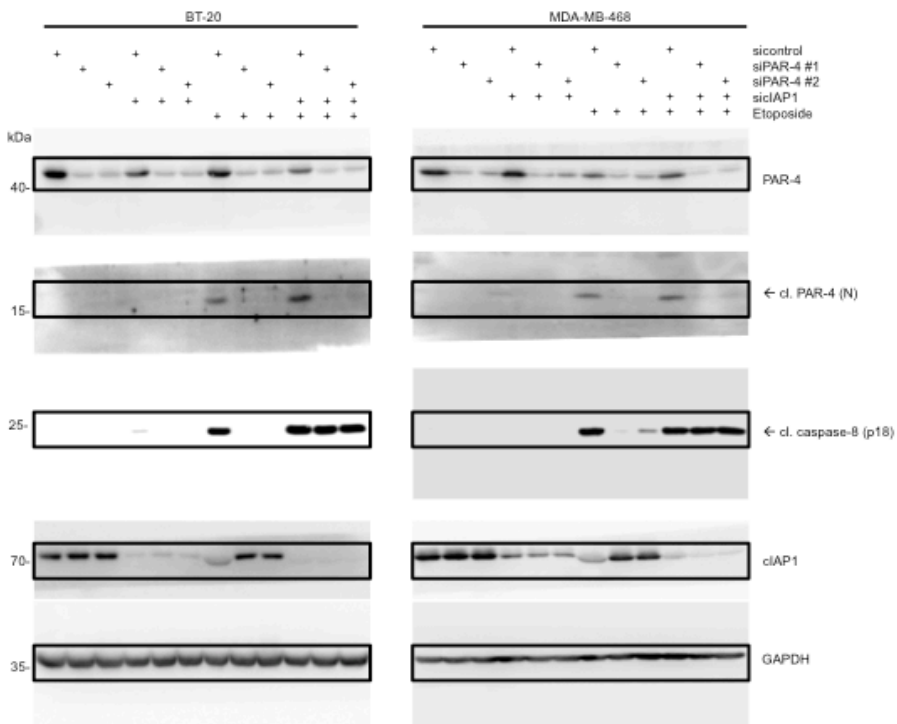

**Supplementary Figure S7:**

Uncropped original images of Western blots are shown belonging to Figure 6.
